# Supplementary material for: Effects of nanostructure geometry on nanoimprinted polymer photovoltaics
Source: Royal Society of Chemistry journal article supplement (doi:10.1039/c4nr01114g), 2014-01-01
Supplement: c4nr01114g1.pdf [file c4nr01114g1.pdf]

# Effects of Nanostructure Geometry on Nanoimprinted Polymer

## Photovoltaics

Yi Yang,<sup>a</sup> Kamil Mielczarek,<sup>b</sup> Mukti Aryal,<sup>c</sup> Anvar Zakhidov<sup>a,b</sup> and Walter Hu<sup>\*a,c</sup>

<sup>a</sup>Department of Materials Science and Engineering, <sup>b</sup>Department of Physics, <sup>c</sup>Department of Electrical Engineering, The University of Texas at Dallas, Richardson, TX 75080, USA

\*E-mail: [walter.hu@utdallas.edu](mailto:walter.hu@utdallas.edu)

### Supporting Information

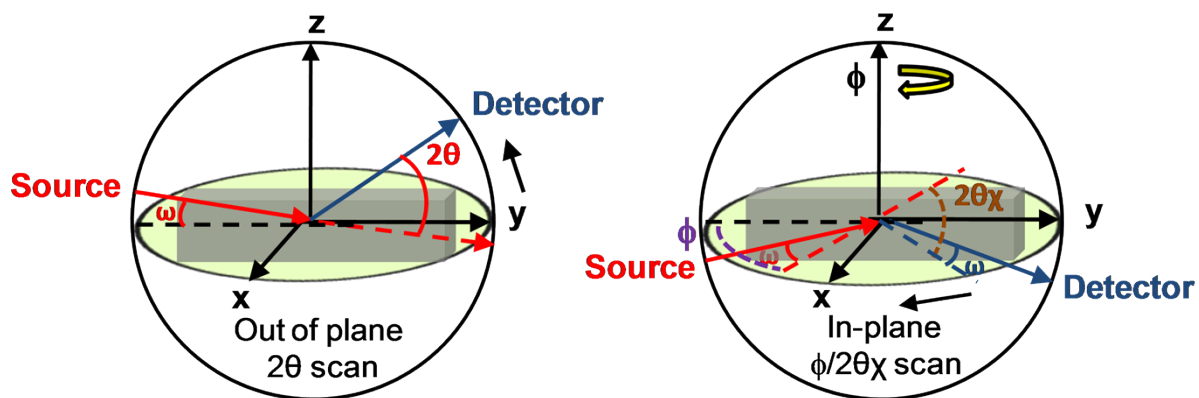

Fig. S1 Schematic of GIXRD setups for (a) out-of-plane measurement with scan axis of  $2\theta$  and (b) in-plane measurement with scan axis of  $\phi/2\theta\chi$ . The incident X-rays in both setups are at a small incident angle  $\omega$  to the plane of sample surfaces.
